# Supplementary material for: Postoperative Myocardial Injury in Patients Classified as Low Risk Preoperatively Is Associated With a Particularly Increased Risk of Long‐Term Mortality After Noncardiac Surgery
Source: PubMed Central journal article supplement — J Am Heart Assoc. 2021 Jun 19;10(14):e019379. doi: 10.1161/JAHA.120.019379 (PMC8483485; doi:10.1161/jaha.120.019379), 2021-06-19
Supplement: JAH3-10-e019379-s001.pdf [file JAH3-10-e019379-s001.pdf]

# **SUPPLEMENTAL MATERIAL**

**Table S1. EKG Breakdown of the Patients with Troponin Elevation.**

| <b>Total</b>                         | <b>211</b> | <b>Percentage (%)</b> |
|--------------------------------------|------------|-----------------------|
| <b>ST Elevation</b>                  | 4          | 1.90                  |
| <b>ST/T consistent with ischemia</b> | 64         | 30.33                 |
| <b>Normal or Non-specific</b>        | 124        | 58.77                 |
| <b>Arrhythmias (A.fib/A.flutter)</b> | 13         | 6.16                  |
| <b>No EKG</b>                        | 6          | 2.84                  |

**Table S2. Management of Patients with Troponin Elevation.**

|                             | <b>Number</b> | <b>Percentage (%)</b> |
|-----------------------------|---------------|-----------------------|
| <b>Cardiology Consulted</b> | 125           | 59.24                 |
| <b>Stress Tests</b>         | 8             | 3.79                  |
| <b>Coronary Angiography</b> | 24            | 11.37                 |
| <b>PTCA or PCI</b>          | 7             | 3.32                  |
| <b>CABG</b>                 | 1             | 0.47                  |

**Table S3. Association of 1-yr Mortality risk in the population with post-op troponin elevation and pre-op risk classification.**

| <b>1yr Mortality</b> |           |               |                    |                    |
|----------------------|-----------|---------------|--------------------|--------------------|
|                      | <b>OR</b> | <b>95% CI</b> | <b>Sensitivity</b> | <b>Specificity</b> |
| Trop High vs Low     | 3.90      | 2.44-6.33     | 0.66               | 0.67               |
| RCRI High vs Low     | 1.57      | 0.97-2.45     | 0.39               | 0.71               |
| NSQIP High vs Low    | 1.43      | 0.90-2.27     | 0.42               | 0.66               |

**Table S4. Association between pre-op risk stratification tools and post-operative troponin elevation.**

| <b>Troponin Elevation</b> |           |               |                    |                    |
|---------------------------|-----------|---------------|--------------------|--------------------|
|                           | <b>OR</b> | <b>95% CI</b> | <b>Sensitivity</b> | <b>Specificity</b> |
| RCRI High vs low          | 1.24      | 0.85-1.79     | 0.33               | 0.71               |
| NSQIP High vs low         | 0.62      | 0.43-0.9      | 0.29               | 0.61               |

**Table S5. 1yr Mortality Risk (Odds Ratio) with MINS vs without at multiple Troponin thresholds.**

|             | <b>OR of Mortality with MINS vs without</b> |                              |                              |
|-------------|---------------------------------------------|------------------------------|------------------------------|
|             | <b><i>1x Upper Limit</i></b>                | <b><i>2x Upper Limit</i></b> | <b><i>3x Upper Limit</i></b> |
| <b>RO</b>   | 6.18 (95% CI: 2.99-12.76)                   | 7.55 (95% CI: 3.98 -15.22)   | 4.64 (95% CI: 2.74-7.85)     |
| <b>NO</b>   | 7.17 (95% CI: 3.13-16.41)                   | 6.67 (95% CI: 3.40-14.12)    | 4.76 (95% CI: 2.71-8.37)     |
| <b>RONO</b> | 9.12 (95% CI: 3.32-25.03)                   | 9.55 (95% CI: 4.27-24.38)    | 5.56 (95% CI: 2.89-10.69)    |

RO: RCRI Low-Risk, NO: NSQIP Low-Risk, RONO: Both RCRI and NSQIP Low-Risk

**Figure S1. STARD flow diagram for the study.**

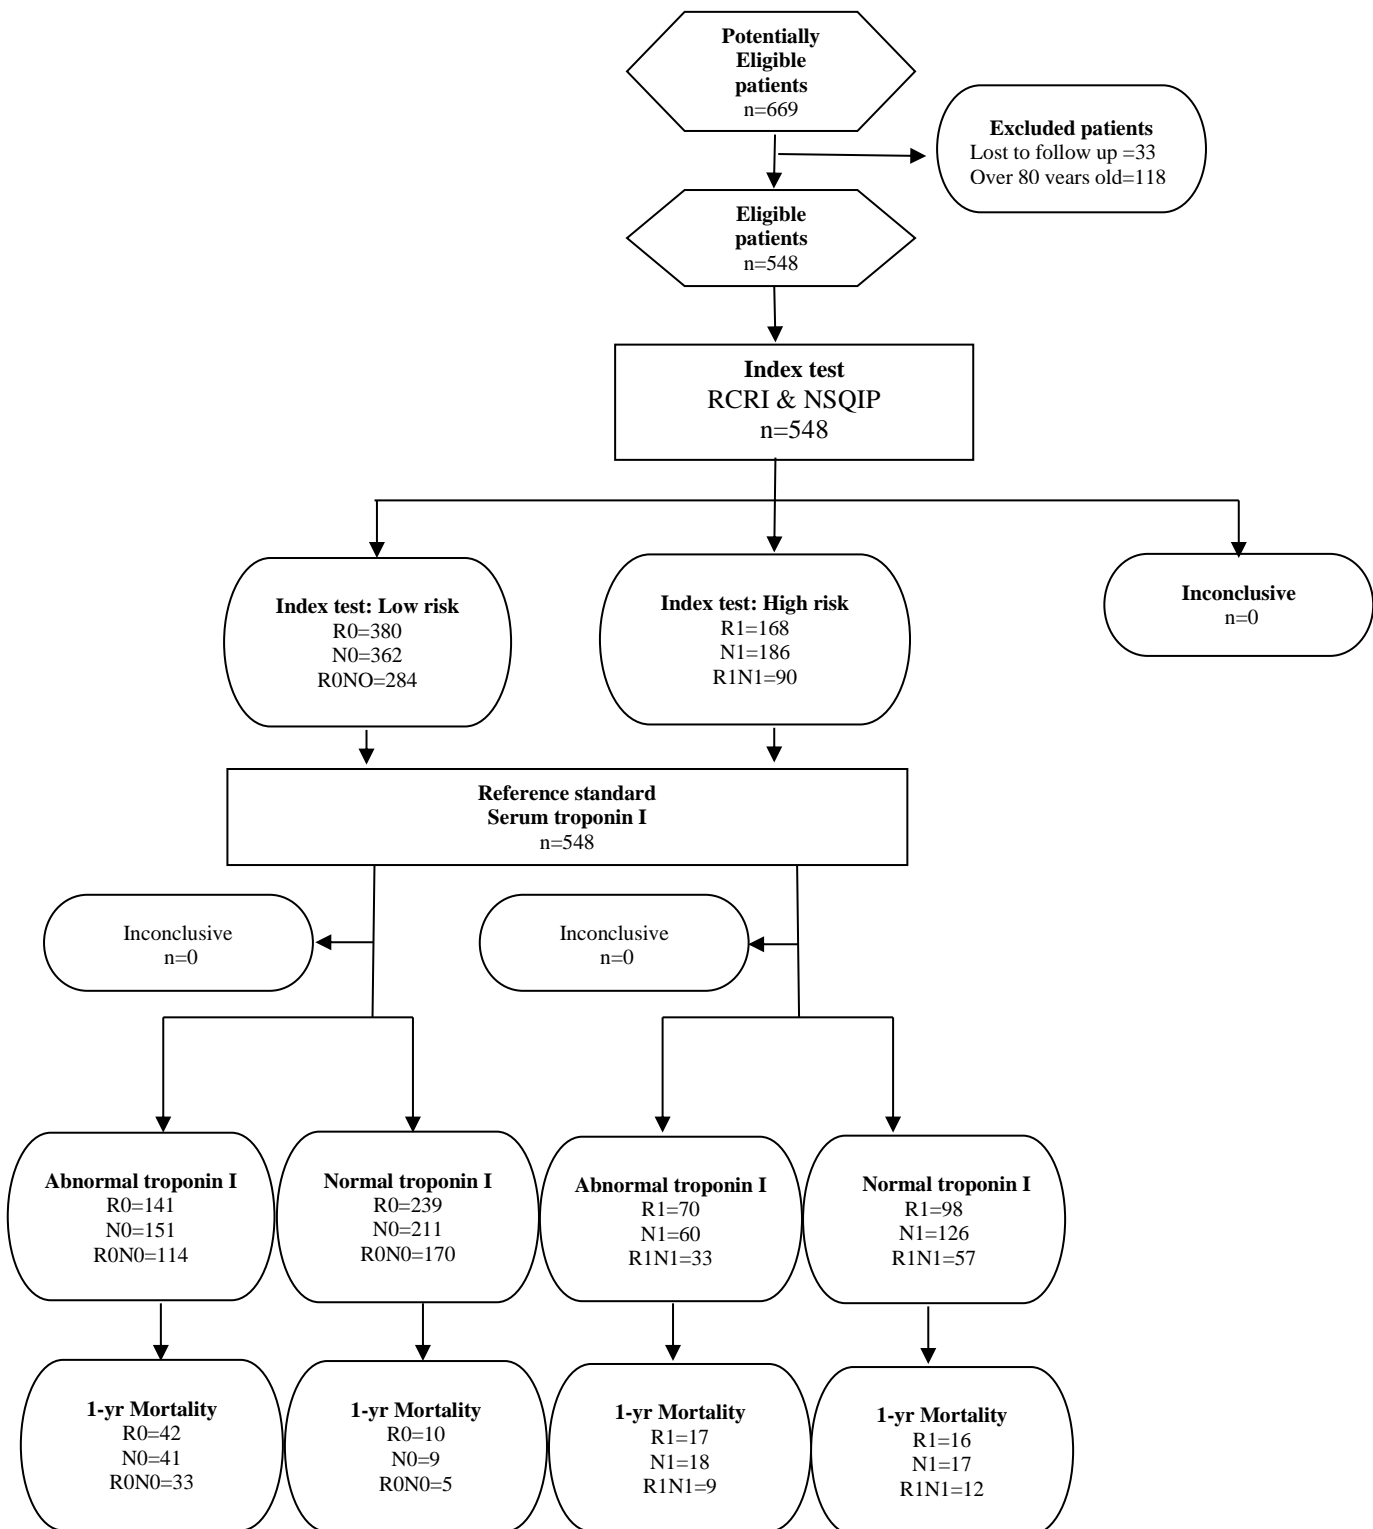

R0=RCRI Low-Risk, R1: RCRI High-Risk, N0: NSQIP Low-Risk, N1: NSQIP High-Risk, R0N0: Both Low-Risk, R1N1: Both High-Risk.

Source: <https://www.equator-network.org/reporting-guidelines/stard/>
